# Supplementary material for: Inclusion of a Phytomedicinal Flavonoid in Biocompatible Surface-Modified Chylomicron Mimic Nanovesicles with Improved Oral Bioavailability and Virucidal Activity: Molecular Modeling and Pharmacodynamic Studies
Source: MDPI journal article supplement (doi:10.3390/pharmaceutics14050905), 2022-04-21
Supplement: s1 [file s1]

## Supporting Information.

### Inclusion of a Phytomedicinal Flavonoid in Biocompatible Surface-Modified Chylomicron Mimic Nanovesicles with Improved Oral Bioavailability and Virucidal Activity: Molecular Modeling and Pharmacodynamic Studies

Mohamed Y. Zakaria <sup>1</sup>, Paris E. Georghiou <sup>2,\*</sup>, Joseph H. Banoub <sup>2,3</sup> and Botros Y. Beshay <sup>4</sup>

**Table S1:** The effect of storage on the physical characteristics of optimized F9 preparation.

| Parameter | Fresh F9   | F9 post-3M at 4°C | F9 post-3M at 25°C |
|-----------|------------|-------------------|--------------------|
| EE%       | 89.6±2.9   | 87.8±1.2          | 86.1±1.8           |
| PS        | 227.4±13.5 | 229.1±10.2        | 231.5±5.4          |
| Q8h       | 78.9±6.7   | 80.1±8.5          | 82.3 ±5.7          |

*Note:* All values exploited as mean±SD (n=3), @ non-significant difference at (P>0.05) compared to that of fresh F9]. *Abbreviations:* EE%, entrapment efficiency percentage; PS, particle size; Q8h, % of MH released after 8 h.

**Table S2:** Computer-aided ADMET parameters of morin hydrate.

|                             |   |                            |        |
|-----------------------------|---|----------------------------|--------|
| BBB_Lev <sup>a</sup>        | 4 | CYP2D6 Prob <sup>e</sup>   | 0.4    |
| Absorption Lev <sup>b</sup> | 2 | CYP2D6 <sup>f</sup>        | 0      |
| AQ SOL Lev <sup>c</sup>     | 2 | Alog P98 <sup>g</sup>      | 1.63   |
| Hepatotox <sup>d</sup>      | 1 | ADMET PSA Lev <sup>h</sup> | 140.30 |

*Notes.*

*a:* Blood brain barrier level: 4= undefined, 2= medium penetration, 1= high penetration.

*b:* Absorption level: 3= very low absorption, 2= low absorption, 1= moderate, 0= good absorption.

*c:* Aqueous solubility level: 4= optimal, 3= good, 2= low solubility, 1= very low but soluble, 0= extremely low.

*d:* Hepatotoxicity level: 1= toxic, 0= nontoxic.

*e:* CYP2D6 inhibition probability.

*f:* CYP2D6 inhibition: 1= likely to inhibit, 0= non inhibitor.

*g:* Alog P98: compounds must have log p value not greater than 5.0 to attain reasonable probability of being well absorbed.

*h:* PSA Lev (polar surface area level): compounds with PSA > 140 have poor bioavailability

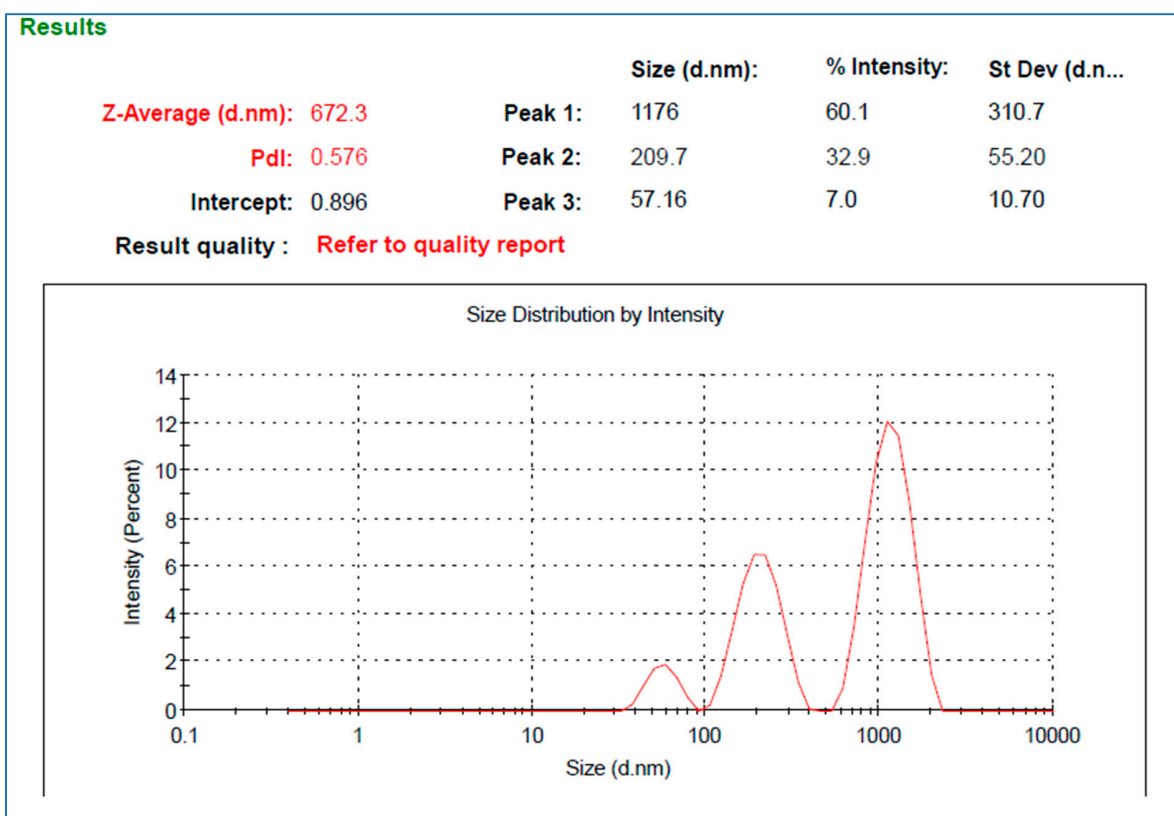

**Figure S1.** Particle size distribution determination of the MH dispersion.

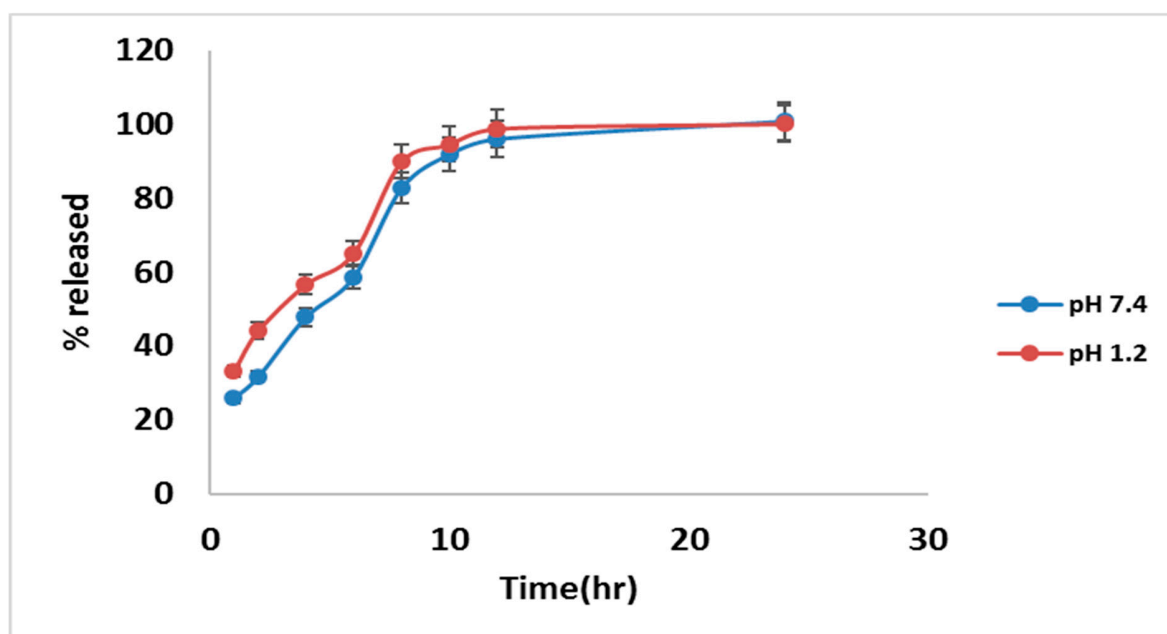

**Figure S2.** In-vitro drug release study of the optimal MH-Loaded PCM Formulation F9 in pH 1.2 acidic media and at pH 7.4 . The pH utilized in the release study was 7.4 to simulate that of the physiological fluid. At pH 1.2 there is initially greater stability.

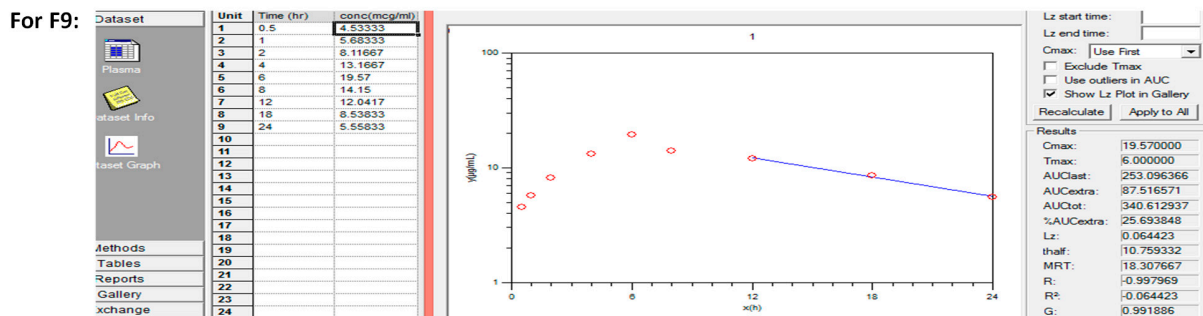

MH-dispersion:

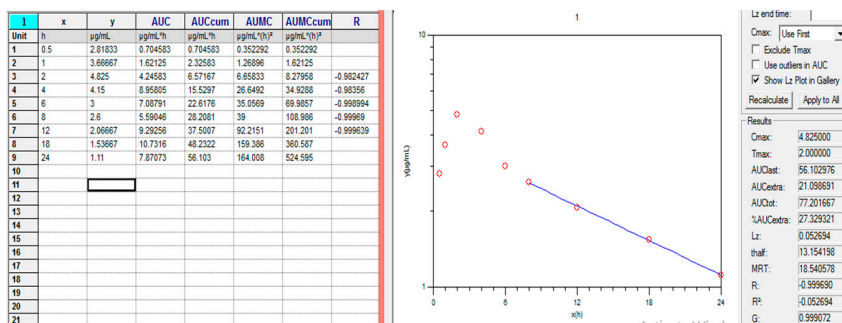

| Time | Formula |      |      |      |      |      | Average | SD  |
|------|---------|------|------|------|------|------|---------|-----|
| 0.5  | 4.1     | 4.6  | 6.6  | 2.8  | 5.8  | 3.3  | 4.5     | 1.5 |
| 1.0  | 5.3     | 4.2  | 7.4  | 5.8  | 6.9  | 4.5  | 5.7     | 1.3 |
| 2.0  | 7.7     | 9.6  | 11.1 | 6.2  | 8.9  | 5.2  | 8.1     | 2.2 |
| 4.0  | 12.9    | 13.6 | 15.3 | 11.3 | 14.1 | 11.8 | 13.2    | 1.5 |
| 6.0  | 17.5    | 20.1 | 16.4 | 21.2 | 18.8 | 23.4 | 19.6    | 2.5 |
| 8.0  | 12.2    | 17.4 | 11.3 | 12.9 | 14.6 | 16.5 | 14.2    | 2.4 |
| 12.0 | 10.4    | 14.3 | 9.8  | 10.9 | 12.7 | 14.2 | 12.0    | 2.0 |
| 18.0 | 8.7     | 9.9  | 7.5  | 8.2  | 9.7  | 7.2  | 8.5     | 1.1 |
| 24.0 | 5.4     | 6.3  | 4.8  | 5.9  | 6.8  | 4.2  | 5.6     | 1.0 |

| Time | MH   |      |      |      |      |      | Average | SD  |
|------|------|------|------|------|------|------|---------|-----|
| 0.5  | 1.41 | 3.50 | 2.20 | 4.30 | 2.60 | 2.90 | 2.8     | 1.0 |
| 1.0  | 2.80 | 3.80 | 5.10 | 2.30 | 4.50 | 3.50 | 3.7     | 1.0 |
| 2.0  | 3.20 | 3.90 | 5.75 | 7.20 | 4.20 | 4.70 | 4.8     | 1.4 |
| 4.0  | 3.20 | 4.20 | 2.60 | 5.70 | 4.40 | 4.80 | 4.2     | 1.1 |
| 6.0  | 3.10 | 2.40 | 1.90 | 2.60 | 3.80 | 4.20 | 3.0     | 0.9 |
| 8.0  | 2.80 | 2.10 | 1.60 | 2.40 | 3.10 | 3.60 | 2.6     | 0.7 |
| 12.0 | 1.80 | 1.60 | 1.30 | 2.10 | 2.70 | 2.90 | 2.1     | 0.6 |
| 18.0 | 1.40 | 1.10 | 0.87 | 1.60 | 2.05 | 2.20 | 1.5     | 0.5 |
| 24.0 | 0.85 | 0.67 | 0.54 | 1.30 | 1.65 | 1.65 | 1.1     | 0.5 |

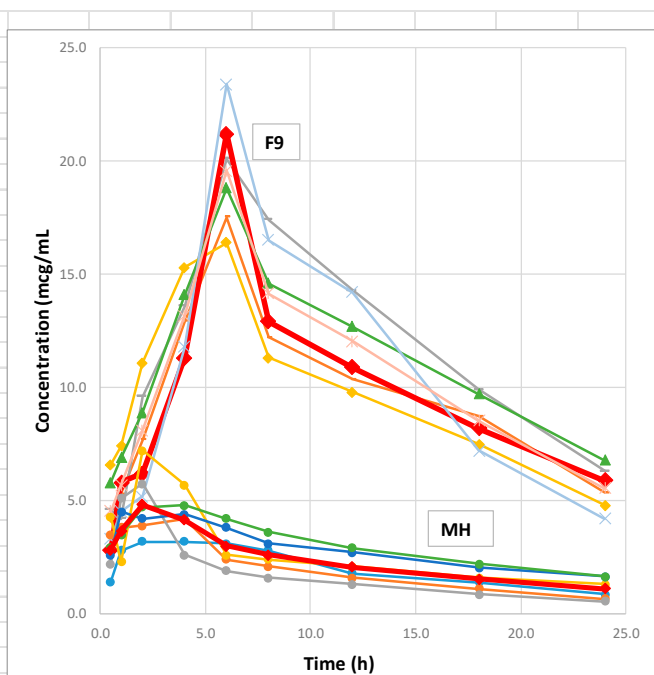

The heavy red lines are the Average Values

**Figure S3.** Experimental data for the concentration profiles of morin hydrate *vs* time after oral administration of optimized F9 PCM formula *Left: F9 (top) and MH dispersion (bottom)* to each of six animals with each reagent. The thick red lines are the profiles of the average concentration values at each data point. *Right: . MERS-CoV plaque assays  $\pm$  S.D.*
